# Supplementary material
Source: publisher figshare collection journal article supplement (https://frontiersin.figshare.com/ndownloader/files/12961004)
Supplement: Supplementary file [file 12961004]

## Supplementary Materials

# Discovery of potent Dishevelled/Dvl inhibitors using virtual screening optimized with NMR-based docking performance index

**Kiminori Hori<sup>1†</sup>, Kasumi Ajioka<sup>2</sup>, Natsuko Goda<sup>1</sup>, Asako Shindo<sup>3</sup>, Maki Takagishi<sup>4</sup>, Takeshi Tenno<sup>1,5</sup>, and Hidekazu Hiroaki<sup>1,2,5,\*</sup>**

<sup>1</sup> Laboratory of Structural Molecular Pharmacology, Graduate School of Pharmaceutical Sciences, Nagoya University, Nagoya 464-8601, Aichi, Japan

<sup>2</sup> Department of Biological Science, School of Science, Nagoya University, Nagoya 464-8601, Aichi, Japan

<sup>3</sup> Division of Biological Science, Graduate School of Science, Nagoya University, Nagoya 464-8601, Aichi, Japan

<sup>4</sup> Department of Pathology, Graduate School of Medicine, Nagoya University, Nagoya, 466-8550, Aichi, Japan

<sup>5</sup> BeCellBar LLC, Business Incubation Center, Nagoya University, Aichi, Nagoya 464-8601, Aichi, Japan

**\* Correspondence:**

Hidekazu Hiroaki, [hiroaki.hidekazu@f.mbox.nagoya-u.ac.jp](mailto:hiroaki.hidekazu@f.mbox.nagoya-u.ac.jp)

**Supplementary Material**

**Supplementary Table S1**

**Supplementary Figure S1**

**Supplementary Figure S2**

**Supplementary Figure S3**

**Supplementary Figure S4**

**Supplementary Figure S5**

Supplementary Table S1

| Compound ID<br>(NPL-) | $\Delta\delta_{\text{ave.}}$ / ppm | GOLD<br>Score | Compound ID<br>(NPL-)          | $\Delta\delta_{\text{ave.}}$ / ppm | GOLD<br>Score |
|-----------------------|------------------------------------|---------------|--------------------------------|------------------------------------|---------------|
| <b>4001</b>           | 0.089                              | 49.23*        | <b>4011</b>                    | 0.058                              | 98.59         |
| <b>4002</b>           | 0.073                              | 51.53*        | <b>4012</b>                    | 0.043                              | 95.83         |
| 4003                  | 0.003                              | 60.09         | <b>4013</b>                    | 0.037                              | 98.47         |
| <b>4004</b>           | 0.030                              | 60.84         | <b>4014</b>                    | 0.012                              | 86.14         |
| 4005                  | 0.002                              | 46.60         | <b>4015</b>                    | 0.017                              | 83.81         |
| 4006                  | 0.003                              | 59.76         | 4016                           | 0.005                              | 59.52         |
| <b>4007</b>           | 0.025                              | 64.39         |                                |                                    |               |
| 4008 <sup>1</sup>     | 0.018                              |               | <sup>1</sup> CalBioChem-322338 |                                    |               |
| 4009 <sup>2</sup>     | 0.003                              | -             | <sup>2</sup> sulindac          |                                    |               |
| 4010 <sup>3</sup>     | 0.003                              | -             | <sup>3</sup> BMD4702           |                                    |               |

Normalized total CSPs of hDvl1-PDZ induced by 2.0 eq. of the advanced Dvl1-PDZ binding compounds. GOLD scores are also indicated as the score with consensus scoring of the function GS-CS. The compounds with  $\Delta\delta_{\text{ave.}}$  larger than 0.010 are marked as bold, which were judged as potential binding. Although NPL-4001 and 4002 showed lower docking scores than the other, the compounds were assessed because they possessed Br atom in the amino-benzoic acid moiety. NPL-4008 ~ 4010 are the reported Dvl binders, CalBioChem-322338, sulindac, and BMD4702, respectively.

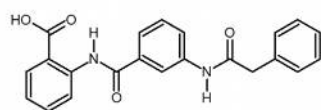**CalBioChem-322338**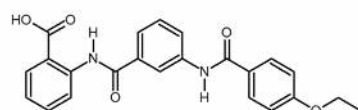**NPL-1010**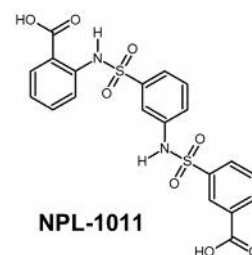**NPL-1011**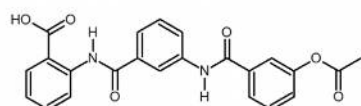**NPL-3001**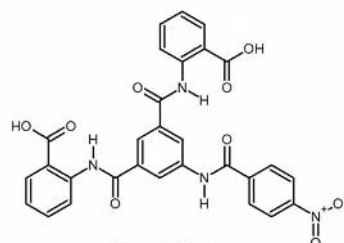**NPL-3002**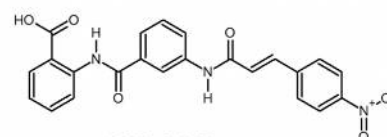**NPL-3003**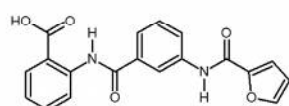**NPL-3004**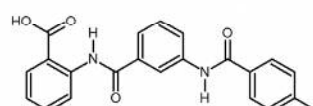**NPL-3005**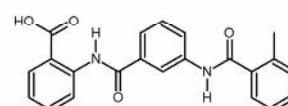**NPL-3006**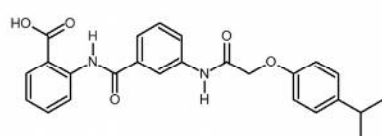**NPL-3007**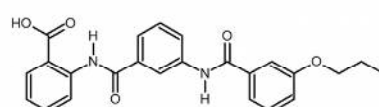**NPL-3008**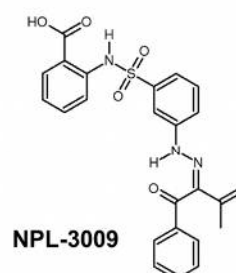**NPL-3009**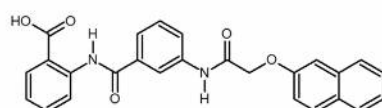**NPL-3010**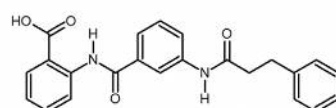**NPL-3011**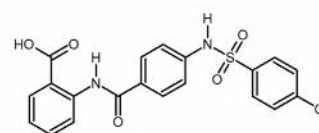**NPL-3012**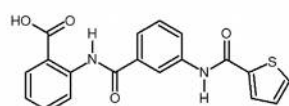**NPL-3013**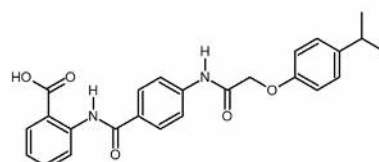**NPL-3014**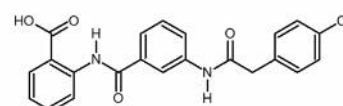**NPL-3015**

### Supplementary Figure S1

Full list of the prototypical PDZ domain-binding compounds used in the study with CalBioChem-322338.

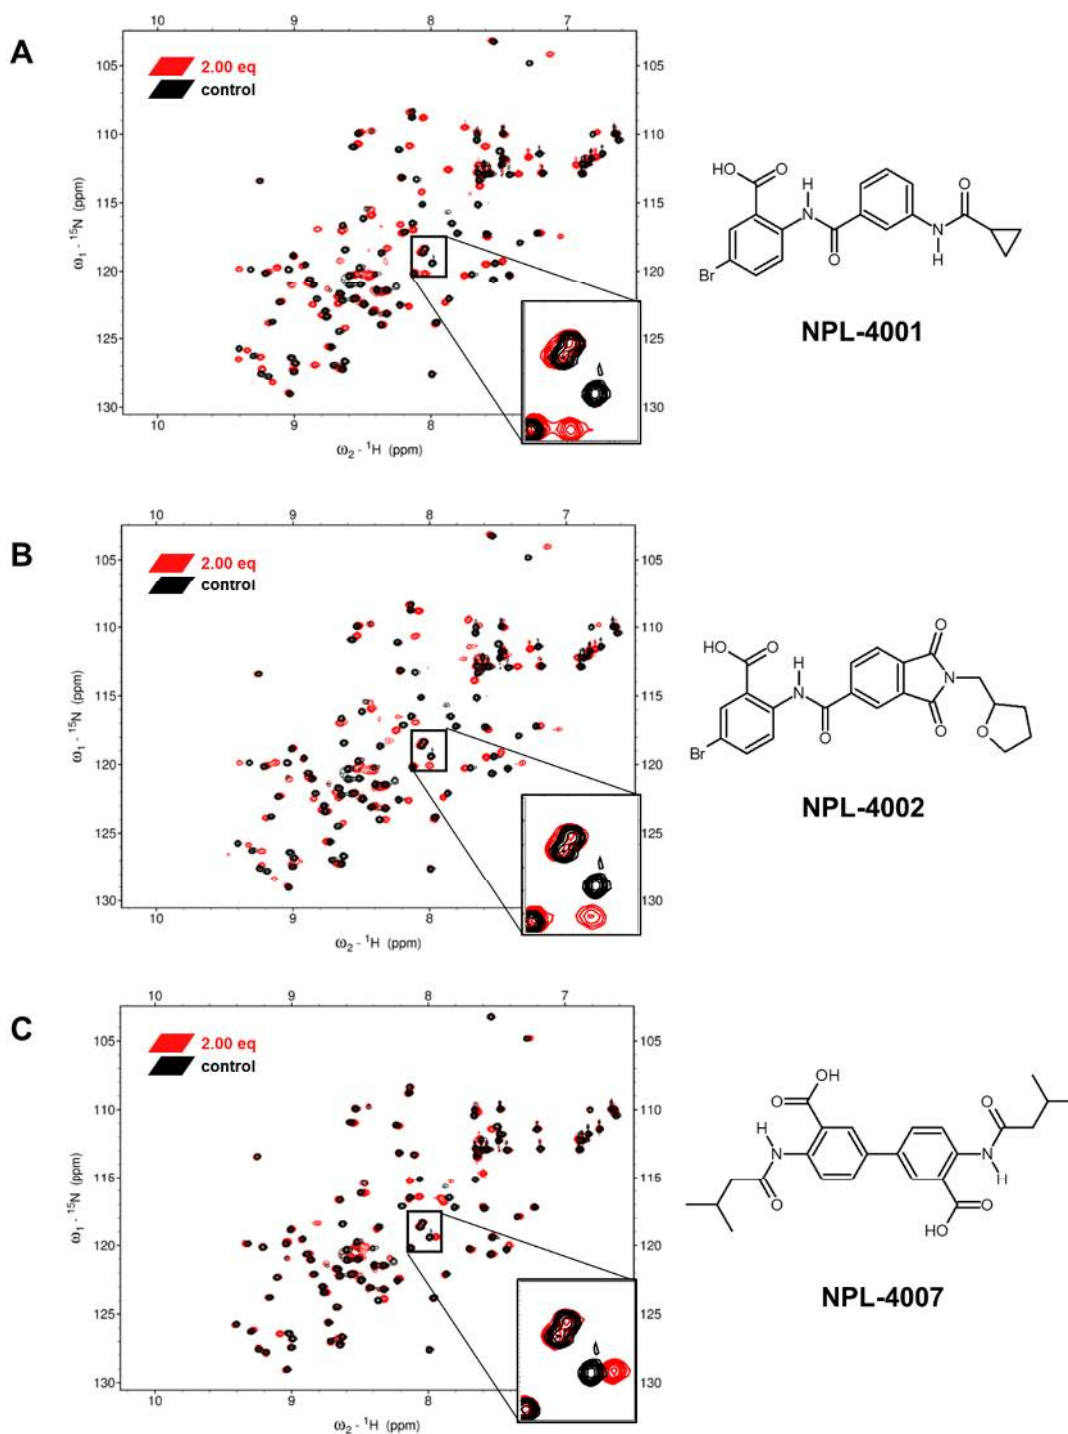

### Supplementary Figure S2

Expanded region of  $^1\text{H}$ - $^{15}\text{N}$  HSQC spectra of hDvl1-PDZ for the NMR titration experiment of hDvl1-PDZ with NPL-4001 (A), 4002 (B), and 4007 (C), with the corresponding chemical structures. The spectra with 0 eq. (black) and 2.0 eq. (red) of the indicated ligand were overlaid.

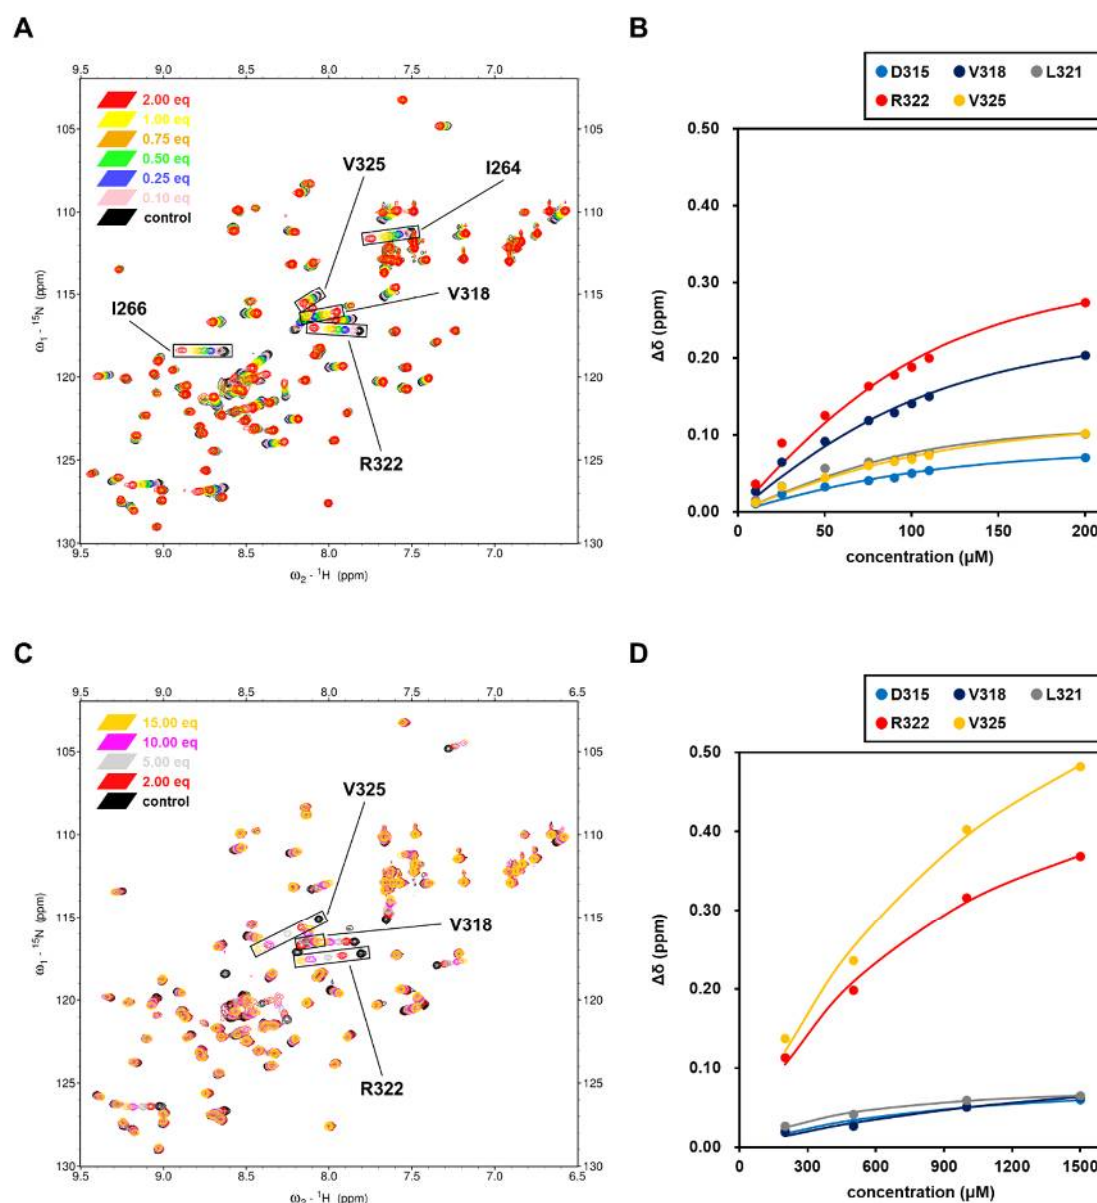

### Supplementary Figure S3

Comparison of the NMR titration experiment of hDvl1-PDZ with NPL-4011 (A, B) and CalBioChem-322338 (C,D). The assignments of the signal series are labeled. A. Expanded region of  $^1\text{H}$ - $^{15}\text{N}$  HSQC spectra of hDvl1-PDZ with 0 eq. (black), 0.25 eq. (pink), 0.5 eq. (navy), 0.75 eq. (green), 1.0 eq. (orange), 1.2 eq. (yellow) and 2.0 eq. (red) of NPL-4011 were overlaid. B. Expanded region of  $^1\text{H}$ - $^{15}\text{N}$  HSQC spectra of hDvl1-PDZ with 0 eq. (black), 2.0 eq. (red), 5.0 eq. (grey), 10 eq. (magenta) and 15 eq. (orange) of CalBioChem-322338 were overlaid. C. Normalized chemical shift changes of the selected hDvl1-PDZ residues upon titration with NPL-4011 were plotted against the ligand concentration. Solid lines indicate the non-linear fitting curves of each signals based on the single-site binding model. D. Normalized chemical shift changes of the selected hDvl1-PDZ residues upon titration with CalBioChem-322338 were plotted against the ligand concentration.

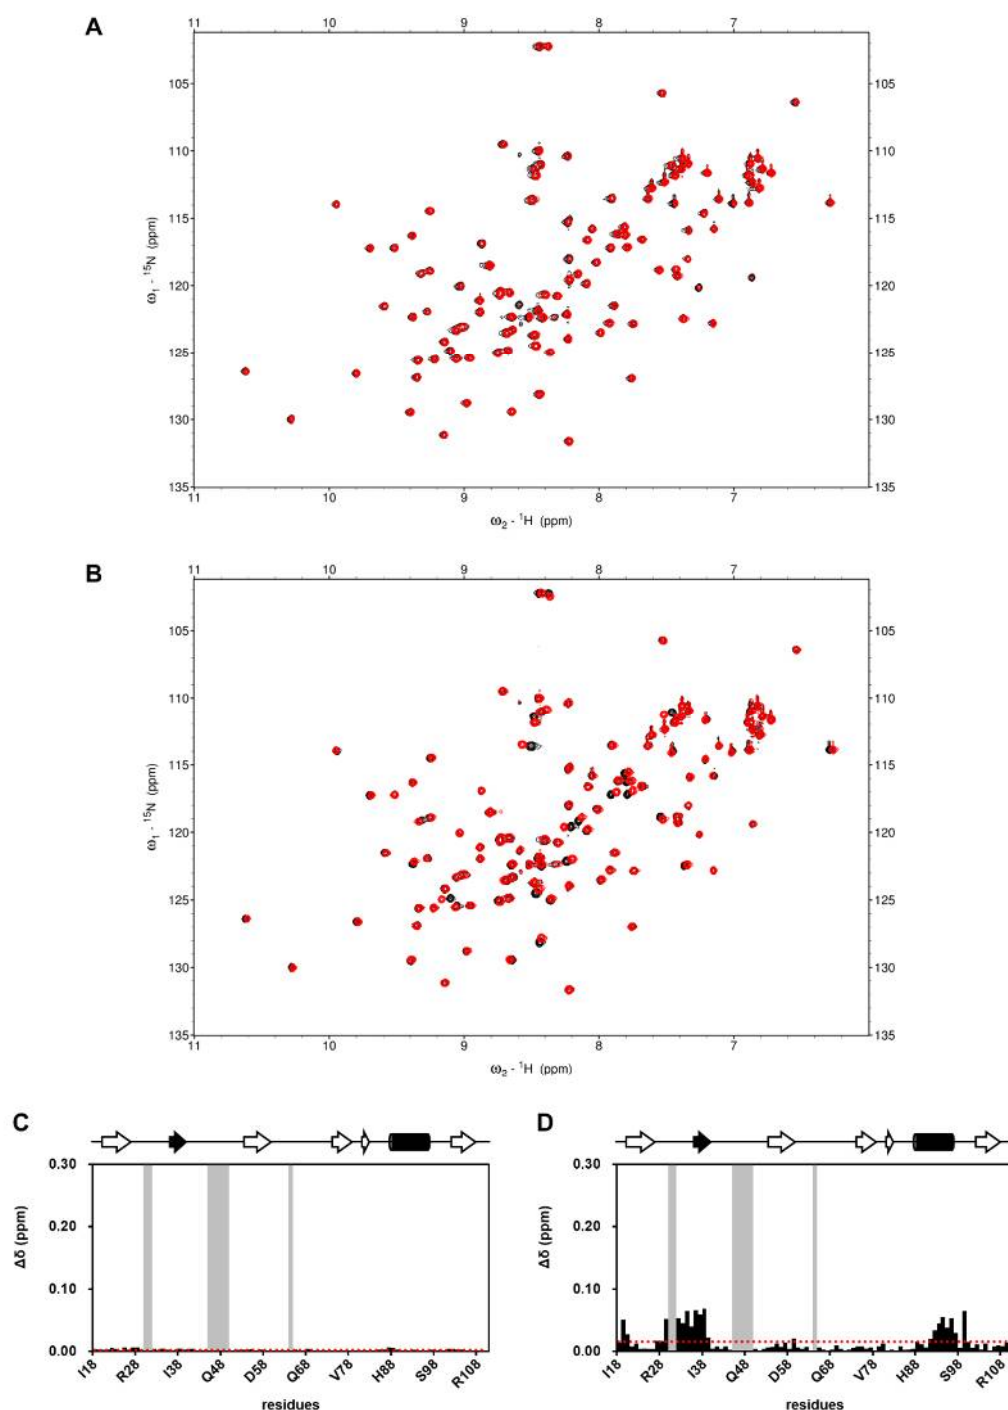

### Supplementary Figure S4

Comparison of the NMR titration experiment of mZO1-PDZ1 with NPL-4011 (A, C) and CalBioChem-322338 (B,D). The assignments of the signal series are labeled. A.  $^1\text{H}$ - $^{15}\text{N}$  HSQC spectra of mZO1-PDZ1 with 0 eq. (black), and 2 eq. (red) of NPL-4011 were overlaid. C.  $^1\text{H}$ - $^{15}\text{N}$  HSQC spectra of mZO1-PDZ1 with 0 eq. (black), and 2 eq. (red) of CalBioChem-322338 were overlaid. B, D; normalized chemical shift changes  $\Delta\delta$  is plotted against residue numbers. Gray residues are missing or unassigned residues, and white residues indicate Pro. The secondary structure of mZO1-PDZ1 is shown at the top of the figures, whereas  $\alpha 2$  and  $\beta 2$  are shown in black.

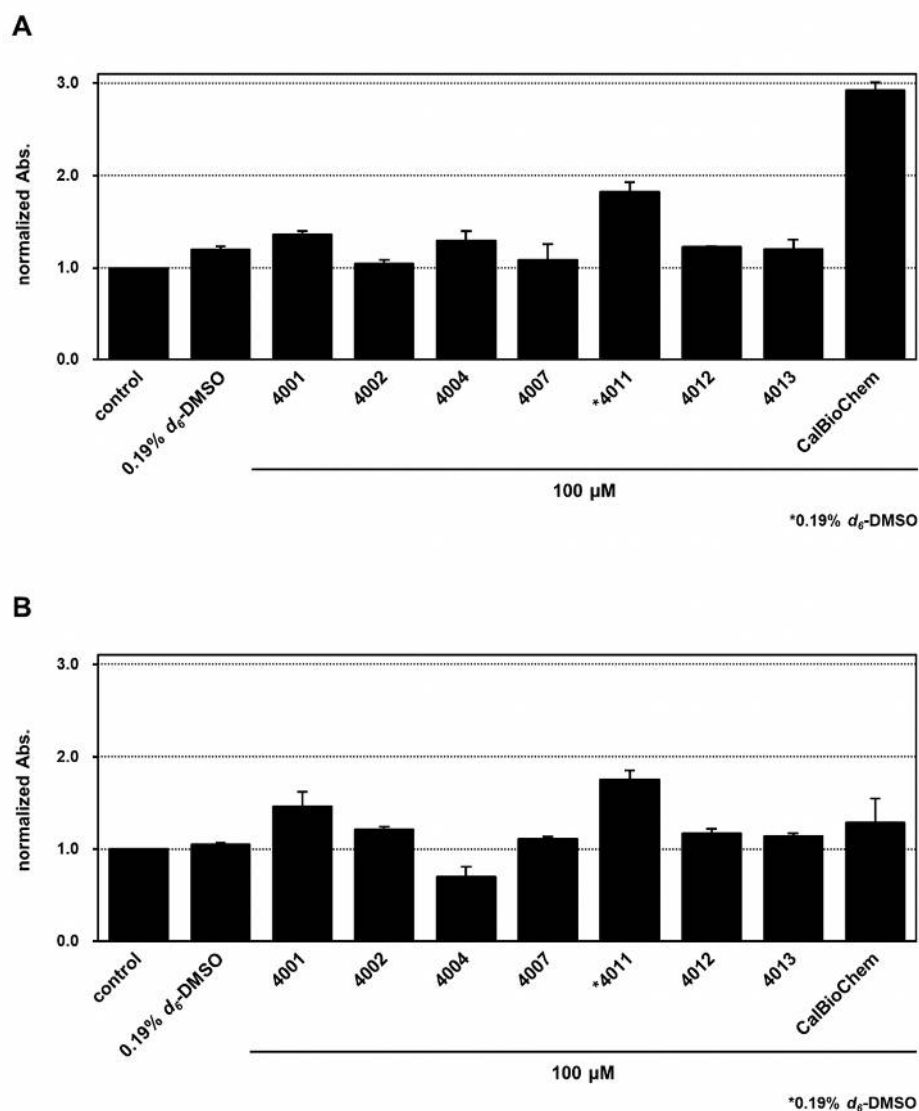

### Supplementary Figure S5

Cytotoxicity of the compounds, NPL-40XX and CalBioChem-322338 against BT-20 triple negative breast cancer. Cells were treated with 100  $\mu$ M of the compounds for 48 h (A) and 96 h (B) including final 0.1%  $d_6$ -DMSO. LDH activity assay was performed to evaluate comparative cytotoxicity. BT-20 triple negative breast cancer cell with indicated compounds, NPL-40XX and CalBioChem-322338. Control cells were incubated with the medium containing 0.1%  $d_6$ -DMSO. NPL-4011 was examined in the presence of 0.19%  $d_6$ -DMSO. The results of normalized absorbance at 490 nm of LDH activity assay with standard deviation were indicated.
